# Supplementary material
Source: PubMed Central journal article supplement (PMC4729268)

**A F8A1.1**

PMN T84

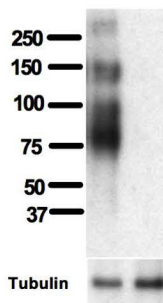

| No. | Printed Glycan Structure                                                                                                                                                      | Structural Representation | RFU   |
|-----|-------------------------------------------------------------------------------------------------------------------------------------------------------------------------------|---------------------------|-------|
| 251 | Neu5Ac $\alpha$ 2-3Gal $\beta$ 1-4(Fuc $\alpha$ 1-3)GlcNAc $\beta$ 1-3Gal $\beta$ 1-4(Fuc $\alpha$ 1-3)GlcNAc $\beta$ 1-3Gal $\beta$ 1-4(Fuc $\alpha$ 1-3)GlcNAc $\beta$ -Sp0 |                           | 5,206 |
| 254 | Neu5Ac $\alpha$ 2-3Gal $\beta$ 1-4(Fuc $\alpha$ 1-3)GlcNAc $\beta$ 1-3Gal $\beta$ -Sp8                                                                                        |                           | 3,867 |
| 255 | Neu5Ac $\alpha$ 2-3Gal $\beta$ 1-4(Fuc $\alpha$ 1-3)GlcNAc $\beta$ 1-3Gal $\beta$ 1-4GlcNAc $\beta$ -Sp8                                                                      |                           | 1,006 |
| 151 | Gal $\beta$ 1-4(Fuc $\alpha$ 1-3)GlcNAc $\beta$ -Sp0                                                                                                                          |                           | ND    |

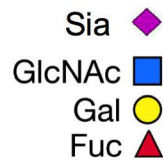

Supplement: mmc2.pdf [file mmc2.pdf]
