# Supplementary material
Source: PubMed Central journal article supplement (PMC4729268)

|                                                                                    | H198 | W6D3 | F8A1.1 |
|------------------------------------------------------------------------------------|------|------|--------|
| 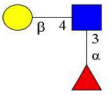   | Yes  | No   | Yes    |
|    | Yes  | Yes  | Yes    |
|    | Yes  | No   | No     |
|    | No   | No   | No     |
|    | No   | No   | No     |
|   | No   | No   | No     |
|  | No   | No   | No     |

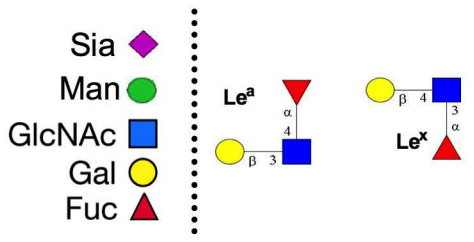

Supplemental Figure 1

Supplement: mmc1.pdf [file mmc1.pdf]
